# Supplementary material for: Line Immunoblot Assay for Tick-Borne Relapsing Fever and Findings in Patient Sera from Australia, Ukraine and the USA
Source: PubMed Central journal article supplement (PMC6955669; doi:10.3390/healthcare7040121), 2019-10-21
Supplement: healthcare-07-00121-s001.pdf [file healthcare-07-00121-s001.pdf]

Supplementary Materials:

Table S1. Pertinent sequence homologies for the scoring RFB proteins in TBRF IBs.

| Species                                                                                       | E-Value                              | %BLASTp Homology | GenBank Accession Number |
|-----------------------------------------------------------------------------------------------|--------------------------------------|------------------|--------------------------|
| <b><i>Borrelia hermsii</i> FlaB (WP_012421925.1) protein homologues in pertinent bacteria</b> |                                      |                  |                          |
| <i>B. parkeri</i>                                                                             | 0                                    | 94               | WP_025375191.1           |
| <i>B. turicatae</i>                                                                           | 0                                    | 94               | WP_011772107.1           |
| <i>B. coriaceae</i>                                                                           | 0                                    | 92               | WP_025407827.1           |
| <i>B. turcica</i>                                                                             | 0                                    | 90               | WP_120103961.1           |
| <i>B. miyamotoi</i>                                                                           | 0                                    | 92               | WP_020954538.1           |
| <i>B. burgdorferi</i>                                                                         | 0                                    | 92               | WP_002556748.1           |
| <i>B. recurrentis</i>                                                                         | 0                                    | 90               | WP_012538694.1           |
| <i>B. lonestari</i>                                                                           | 0                                    | 87               | AAW 38937.1              |
| <i>Treponema pallidum</i>                                                                     | 8.00E-71                             | 39               | CAA 45382.1              |
| <i>Treponema denticola</i>                                                                    | 3.00E-70                             | 39               | WP_002668950.1           |
| <i>Escherichia coli</i>                                                                       | 6.00E-40                             | 32               | WP_096282488.1           |
| <b><i>Borrelia hermsii</i> BipA (ADF49614.1) protein homologues in pertinent bacteria</b>     |                                      |                  |                          |
| <i>B. turicatae</i>                                                                           | 3.00E-98                             | 41               | AGN 32383.1              |
| <i>B. parkeri</i>                                                                             | 3.00E-82                             | 55               | AHF 45615.1              |
| <i>B. duttoni</i>                                                                             | 7.00E-64                             | 47               | WP_012539436.1           |
| <i>B. crocidurae</i>                                                                          | 2.00E-64                             | 47               | WP_025401306.1           |
| <i>B. recurrentis</i>                                                                         | 7.00E-61                             | 46               | WP_012539315.1           |
| <i>B. coriaceae</i>                                                                           | 4.00E-53                             | 32               | AHH11081.1               |
| <i>B. miyamotoi</i>                                                                           | 4.00E-24                             | 40               | WP_099591036.1           |
| <i>B. turcica</i>                                                                             | 3.00E-20                             | 34               | WP_120104729.1           |
| <i>B. garinii</i>                                                                             | 2.00E-07                             | 27               | WP_032986216.1           |
| <i>B. burgdorferi</i> ss                                                                      | 4.00E-06                             | 25               | ACO 38445.1              |
| <i>E. coli</i> taxid                                                                          | No significant homologues identified |                  |                          |
| <i>Treponema</i> taxid                                                                        | No significant homologues identified |                  |                          |
| <b><i>Borrelia hermsii</i> GlpQ (ADD63790.1) protein homologues in pertinent bacteria</b>     |                                      |                  |                          |
| <i>B. turicatae</i>                                                                           | 0                                    | 89               | AAG 24363.1              |
| <i>B. miyamotoi</i>                                                                           | 0                                    | 89               | WP_025443886.1           |
| <i>B. parkeri</i>                                                                             | 0                                    | 89               | AAG 24362.1              |
| <i>B. coriaceae</i>                                                                           | 0                                    | 88               | AAG 24364.1              |
| <i>B. turcica</i>                                                                             | 0                                    | 86               | WP_120104645.1           |
| <i>B. recurrentis</i>                                                                         | 2.00E-175                            | 89               | AHM 02189.1              |
| <i>E. coli</i>                                                                                | 2.00E-115                            | 49               | WP_001400696.1           |
| <i>Treponema pallidum</i>                                                                     | 3.00E-83                             | 39               | WP_010881706.1           |
| <i>Treponema denticola</i>                                                                    | 3.00E-14                             | 30               | WP_002671949.1           |
| <i>B. afzelli</i>                                                                             | 1.1                                  | 35               | ACJ 73522.1              |
| <i>B. burgdorferi</i> ss                                                                      | No significant homologues identified |                  |                          |

| Species                                                                                       | E-Value                              | %BLASTp Homology | GenBank Accession Number |
|-----------------------------------------------------------------------------------------------|--------------------------------------|------------------|--------------------------|
| <b><i>Borrelia hermsii</i> fHbp (WP_025407000.1) protein homologues in pertinent bacteria</b> |                                      |                  |                          |
| <i>B. turicatae</i>                                                                           | 6.00E-68                             | 62               | WP_020282240.1           |
| <i>B. parkeri</i>                                                                             | 8.00E-66                             | 62               | CBJ 18717.1              |
| <i>B. miyamotoi</i>                                                                           | 6.00E-52                             | 52               | WP_084821552.1           |
| <i>B. valaisiana</i>                                                                          | 2.00E-45                             | 56               | WP_015899234.1           |
| <i>B. coriaceae</i>                                                                           | 2.00E-44                             | 52               | WP_025408527.1           |
| <i>B. recurrentis</i>                                                                         | 1.00E-36                             | 42               | CAV 05787.1              |
| <i>B. bavariensis</i>                                                                         | 4.00E-31                             | 40               | WP_123772075.1           |
| <i>B. afzelli</i>                                                                             | 4.00E-30                             | 40               | WP_011703930.1           |
| <i>B. burgdoferi</i> ss                                                                       | No significant homologues identified |                  |                          |
| <i>E. coli</i> taxid                                                                          | No significant homologues identified |                  |                          |
| <i>Treponema</i> taxid                                                                        | No significant homologues identified |                  |                          |
